# Supplementary material for: Contribution of cryptochromes and photolyases for insect life under sunlight
Source: PubMed Central journal article supplement (PMC10102093; doi:10.1007/s00359-022-01607-5), 2023-01-06

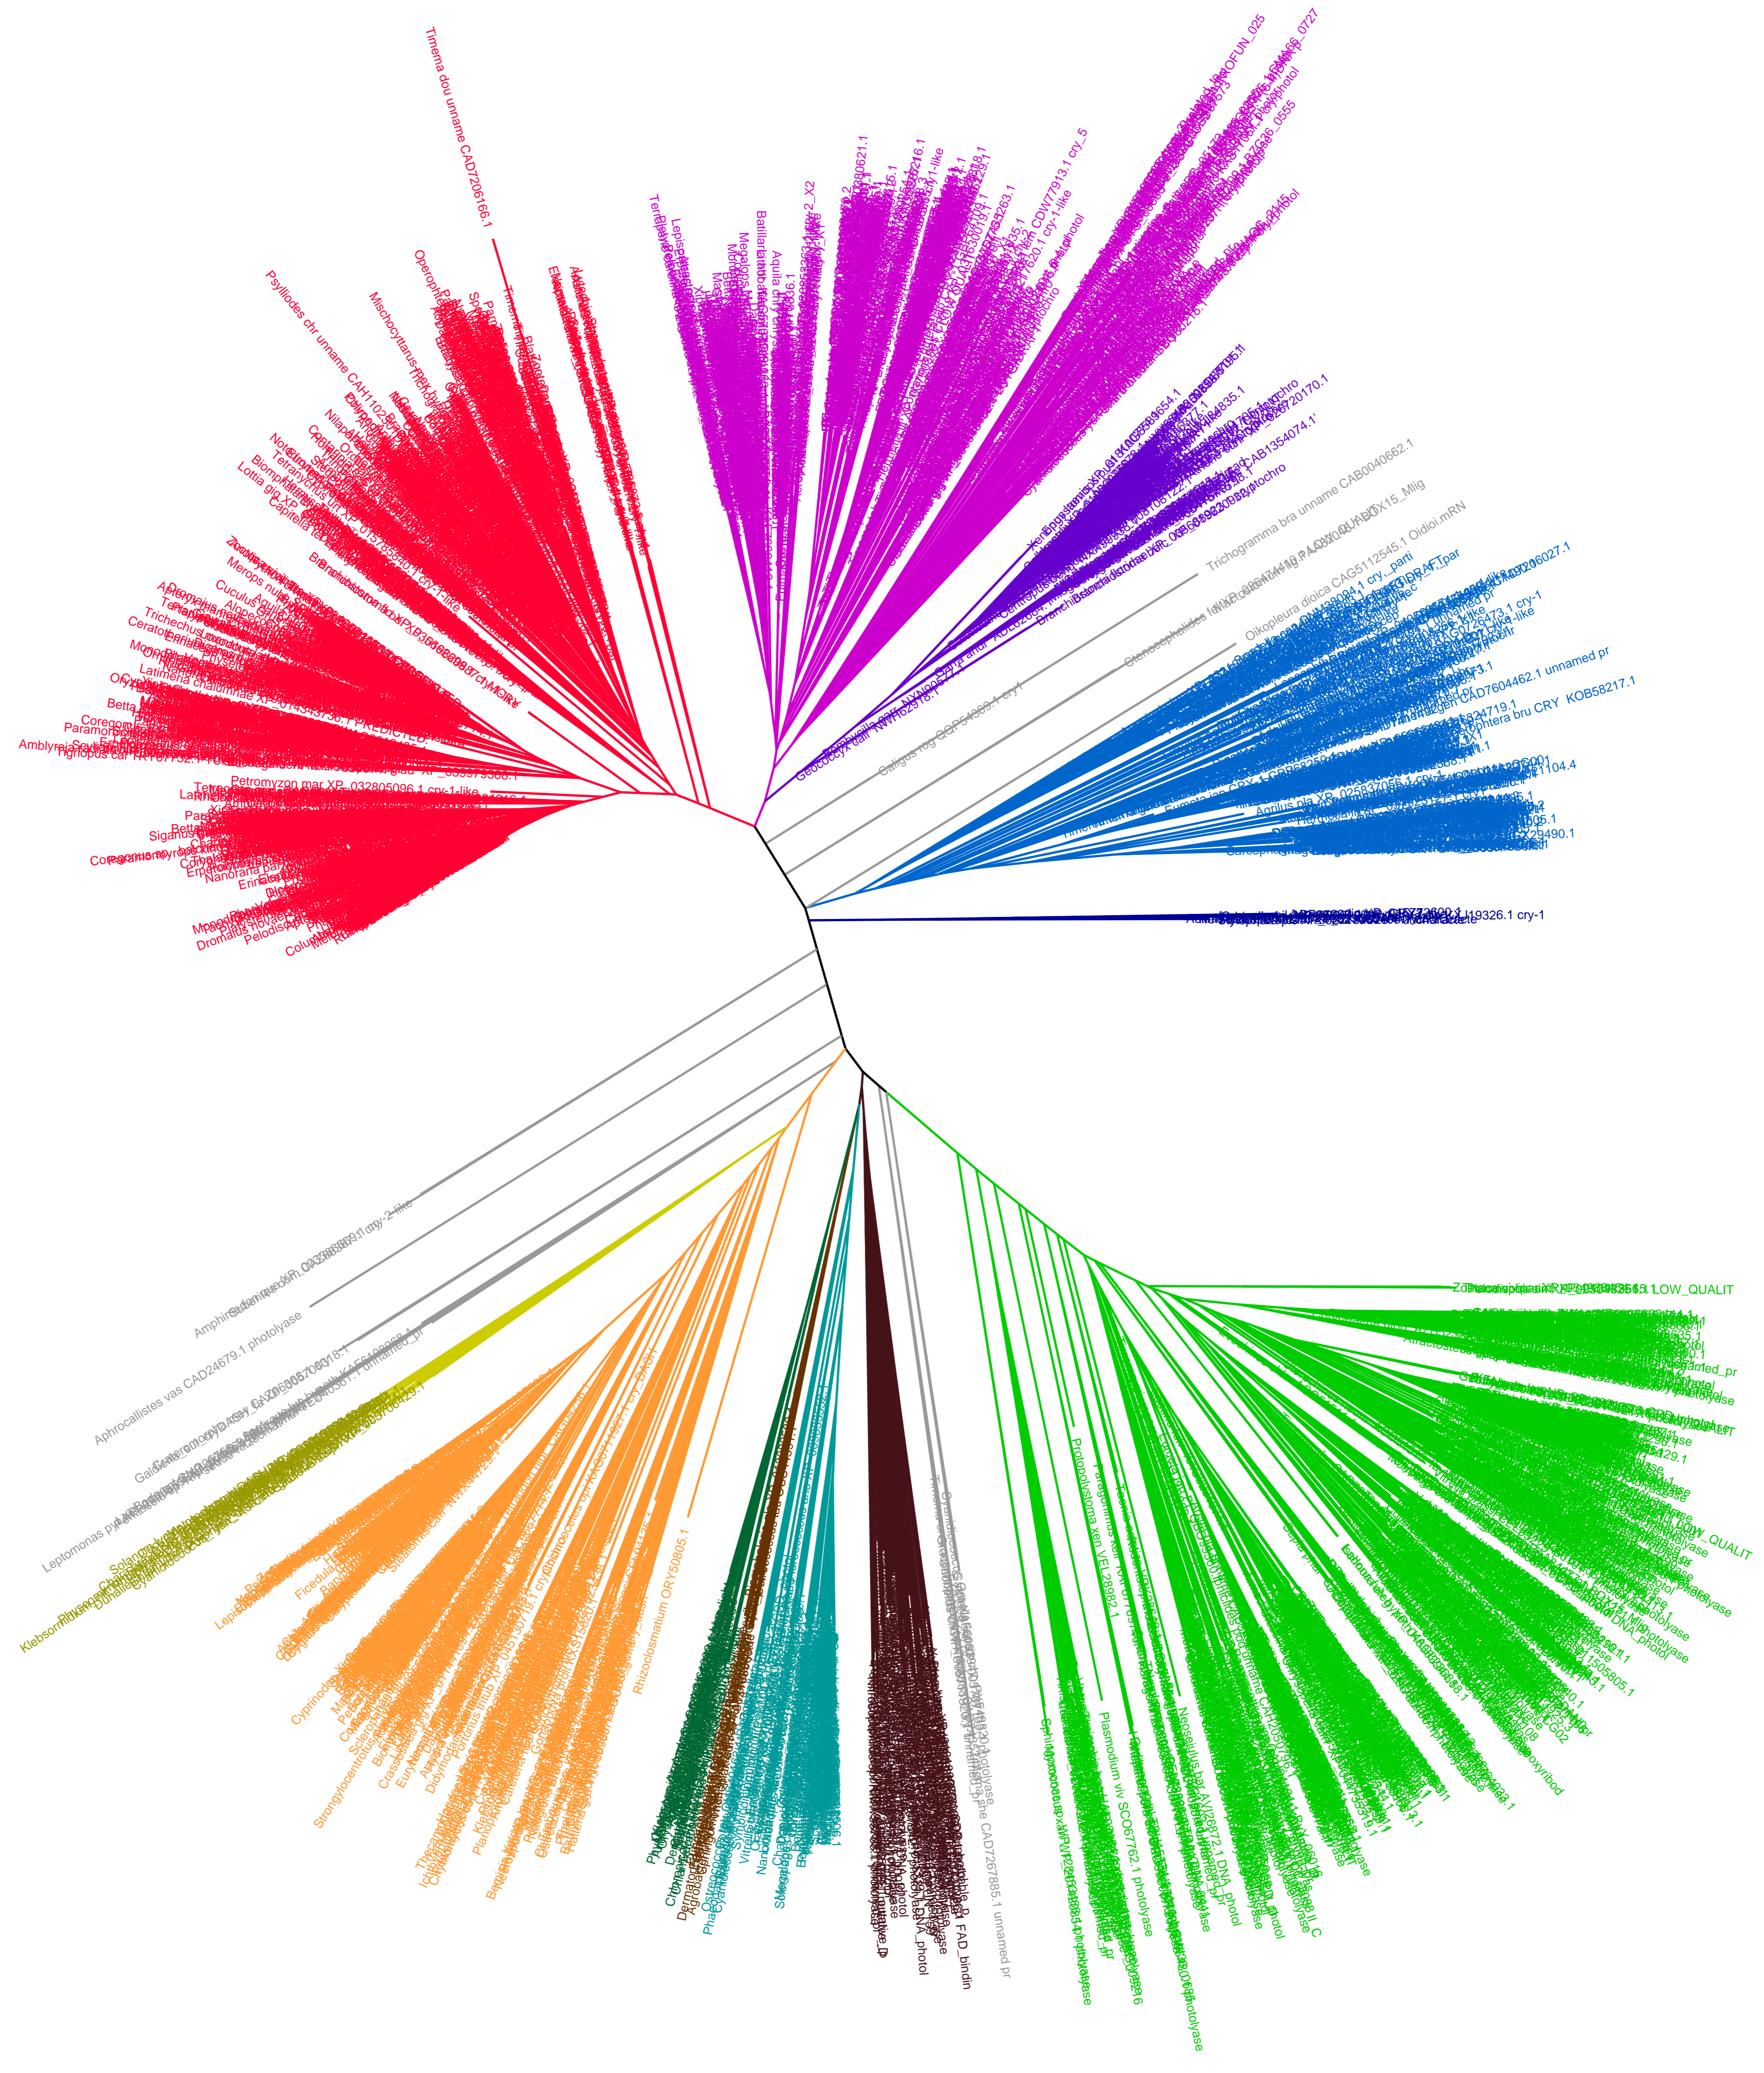

Supplement: 359_2022_1607_MOESM4_ESM.pdf [file 359_2022_1607_MOESM4_ESM.pdf]
