# Supplementary material for: Contribution of cryptochromes and photolyases for insect life under sunlight
Source: PubMed Central journal article supplement (PMC10102093; doi:10.1007/s00359-022-01607-5), 2023-01-06

# Supplementary file 8

1. Timema protein sequence alignment.....1
2. Ladona & Ishnura protein sequence alignment.....2
3. Tephritoidea protein sequence alignment.....3
4. Bactrocera dor & Bactrocera ole detailed protein sequence alignment.....5
5. Bactrocera dor & Bactrocera ole nucleotide sequence alignment.....6

## 1. Timema protein sequence alignment

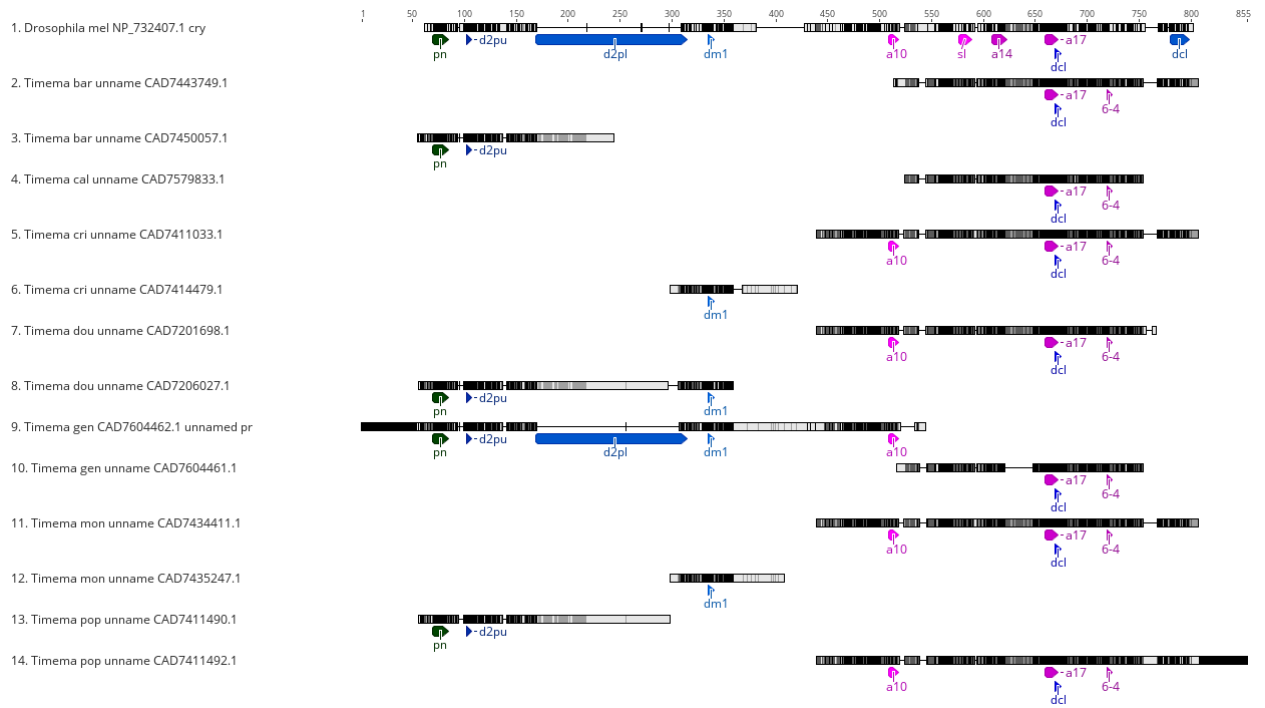

## 2. Ladona & Ischnura protein sequence alignment

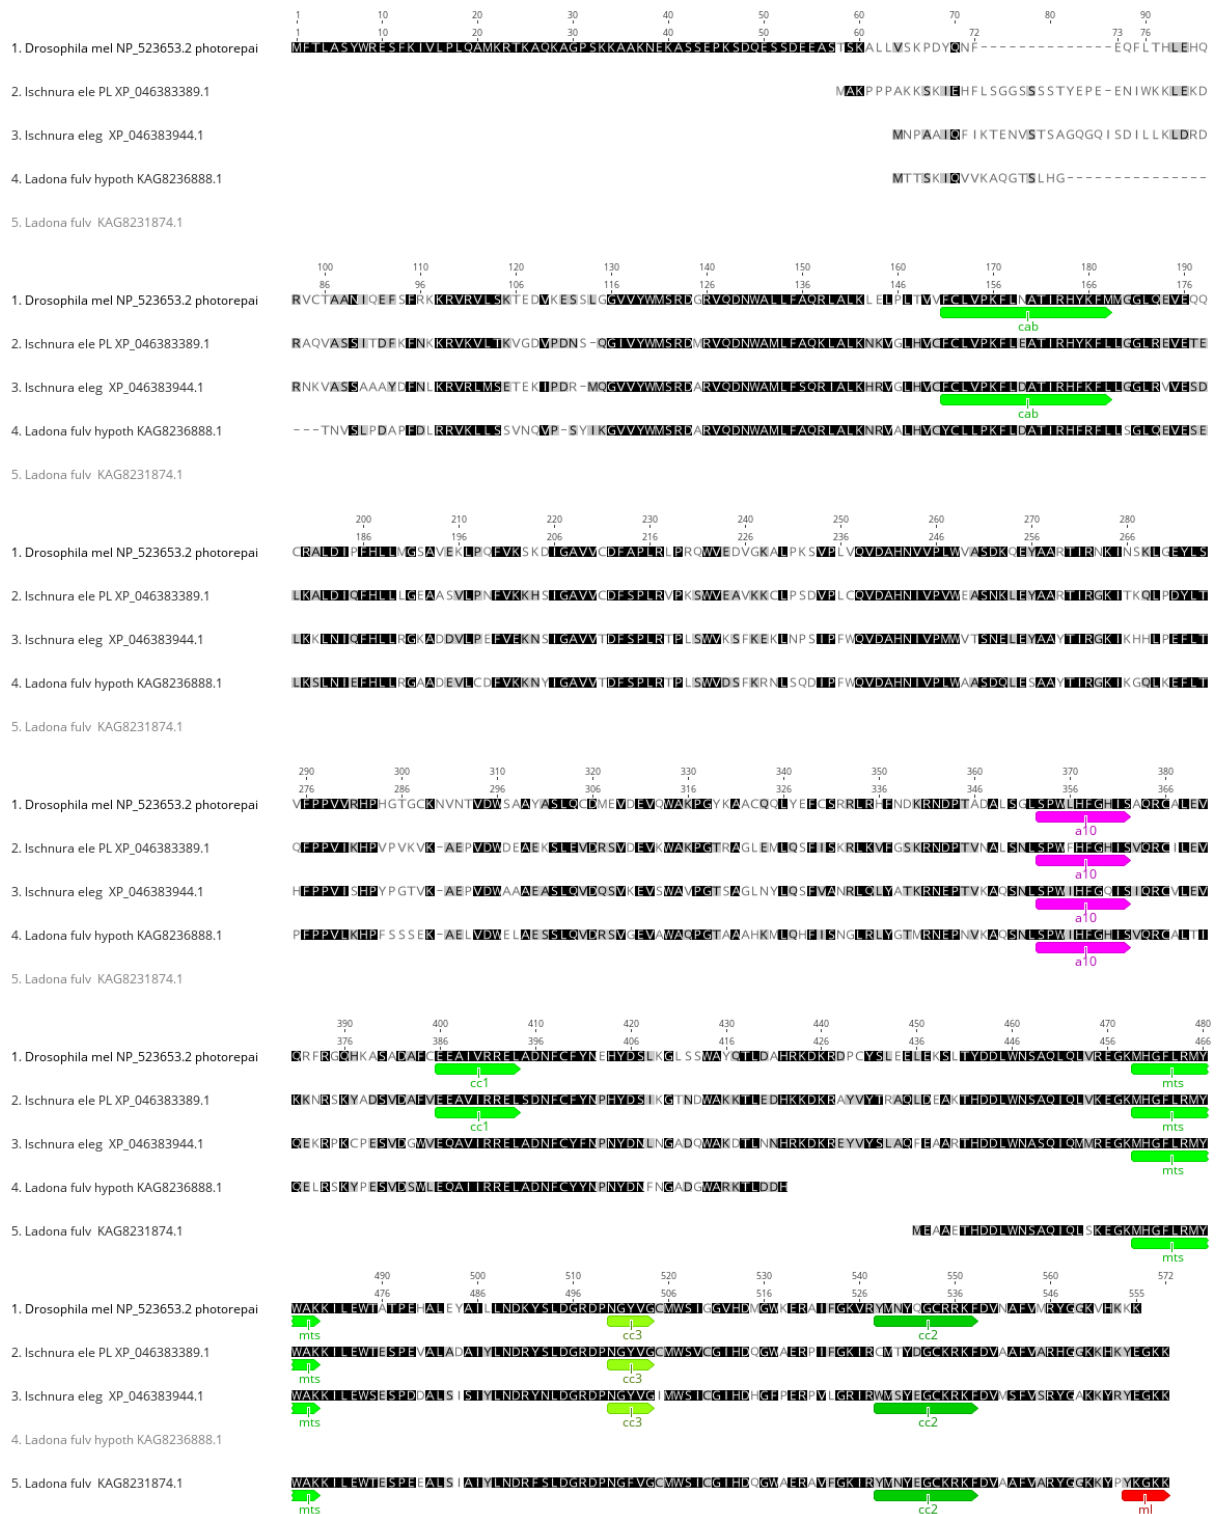



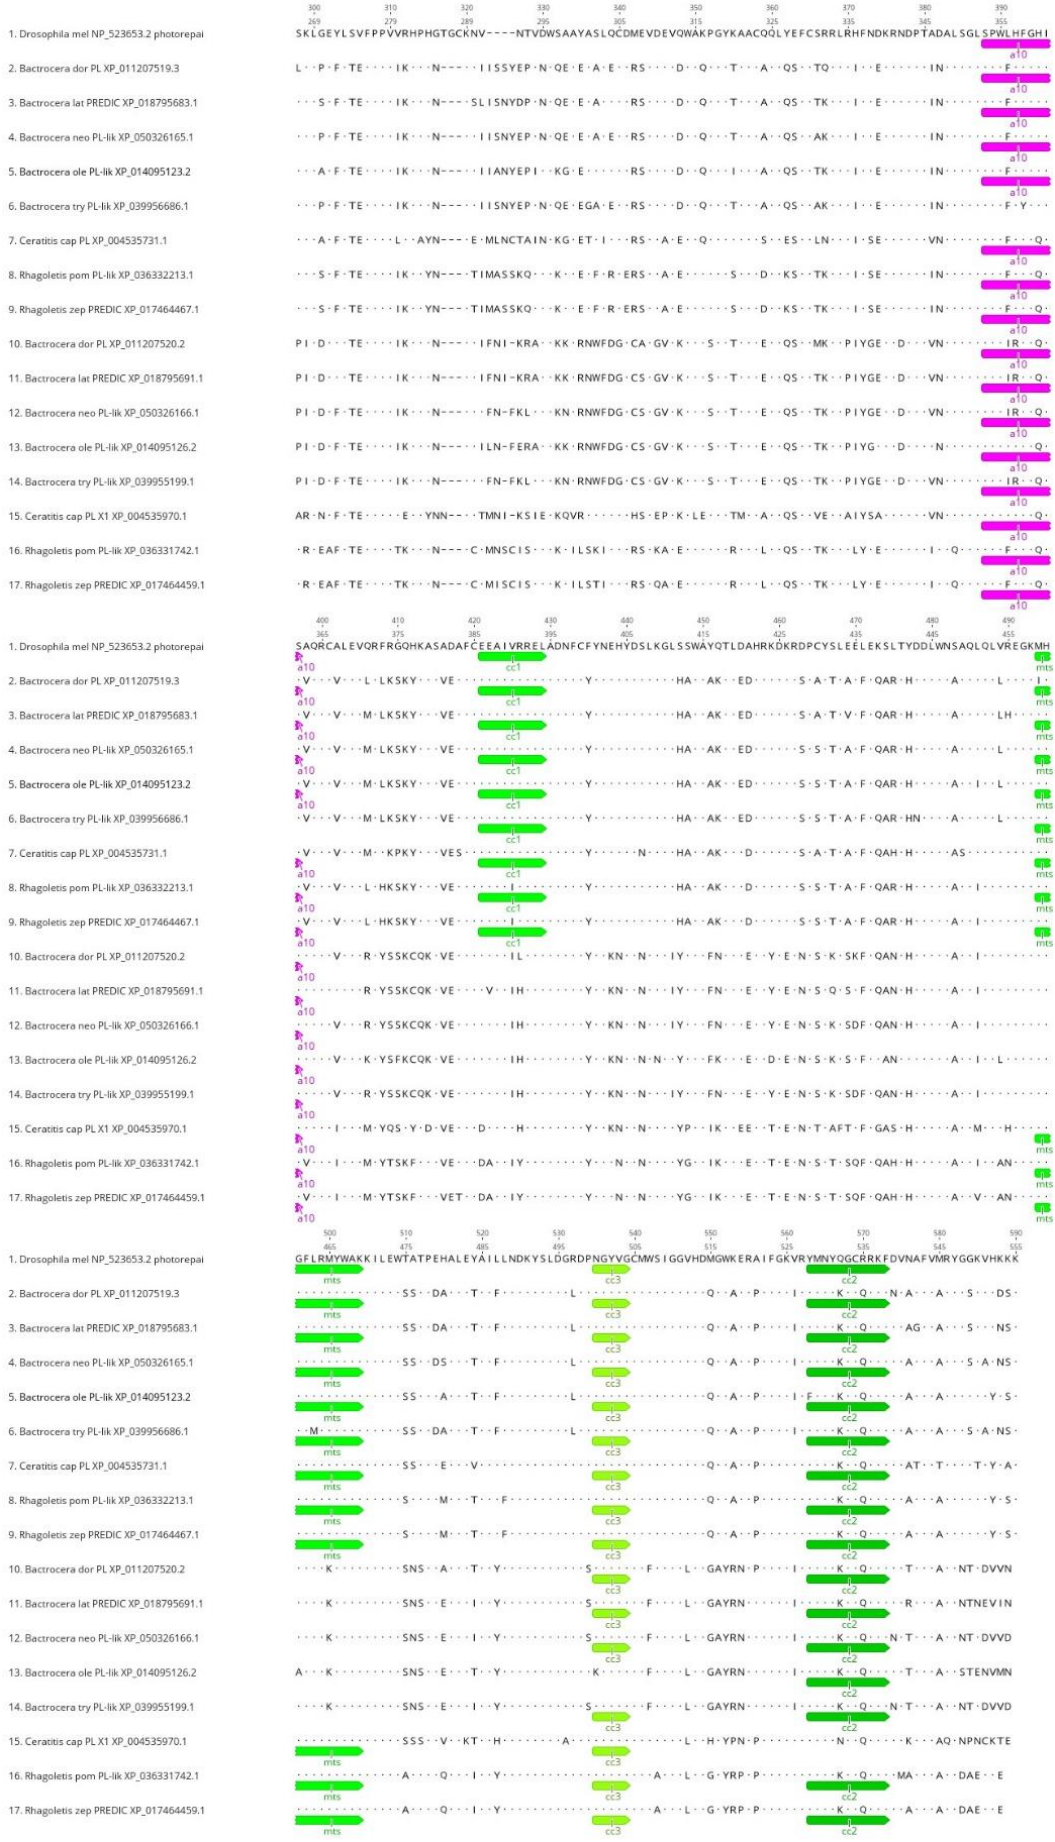

#### 4. Bactrocera dor & Bactrocera ole detailed protein sequence alignment

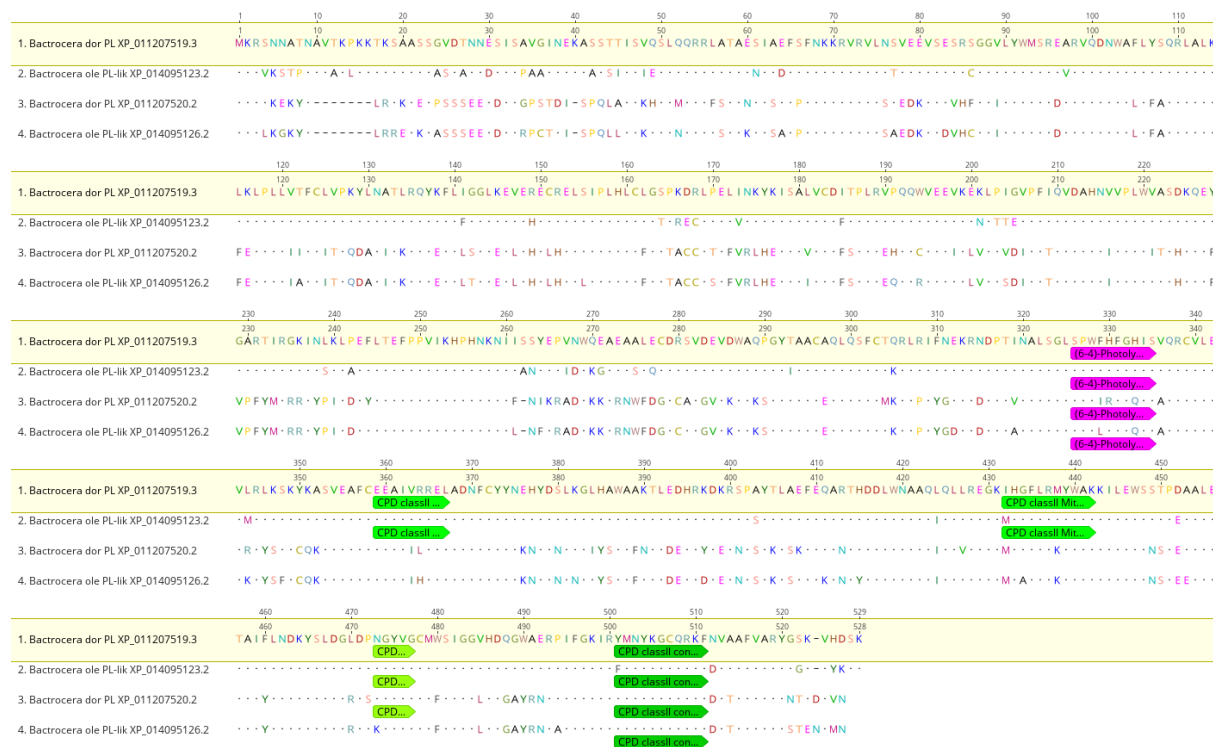

Supplement: 359_2022_1607_MOESM8_ESM.pdf [file 359_2022_1607_MOESM8_ESM.pdf]
